# Supplementary material for: Effects of Synbiotic Supplement on Human Gut Microbiota, Body Composition and Weight Loss in Obesity
Source: MDPI journal article supplement (doi:10.3390/nu12010222), 2020-01-15
Supplement: s1 [file s1]

# Relative Abundance of Genera per Sample

RelativeAbundance

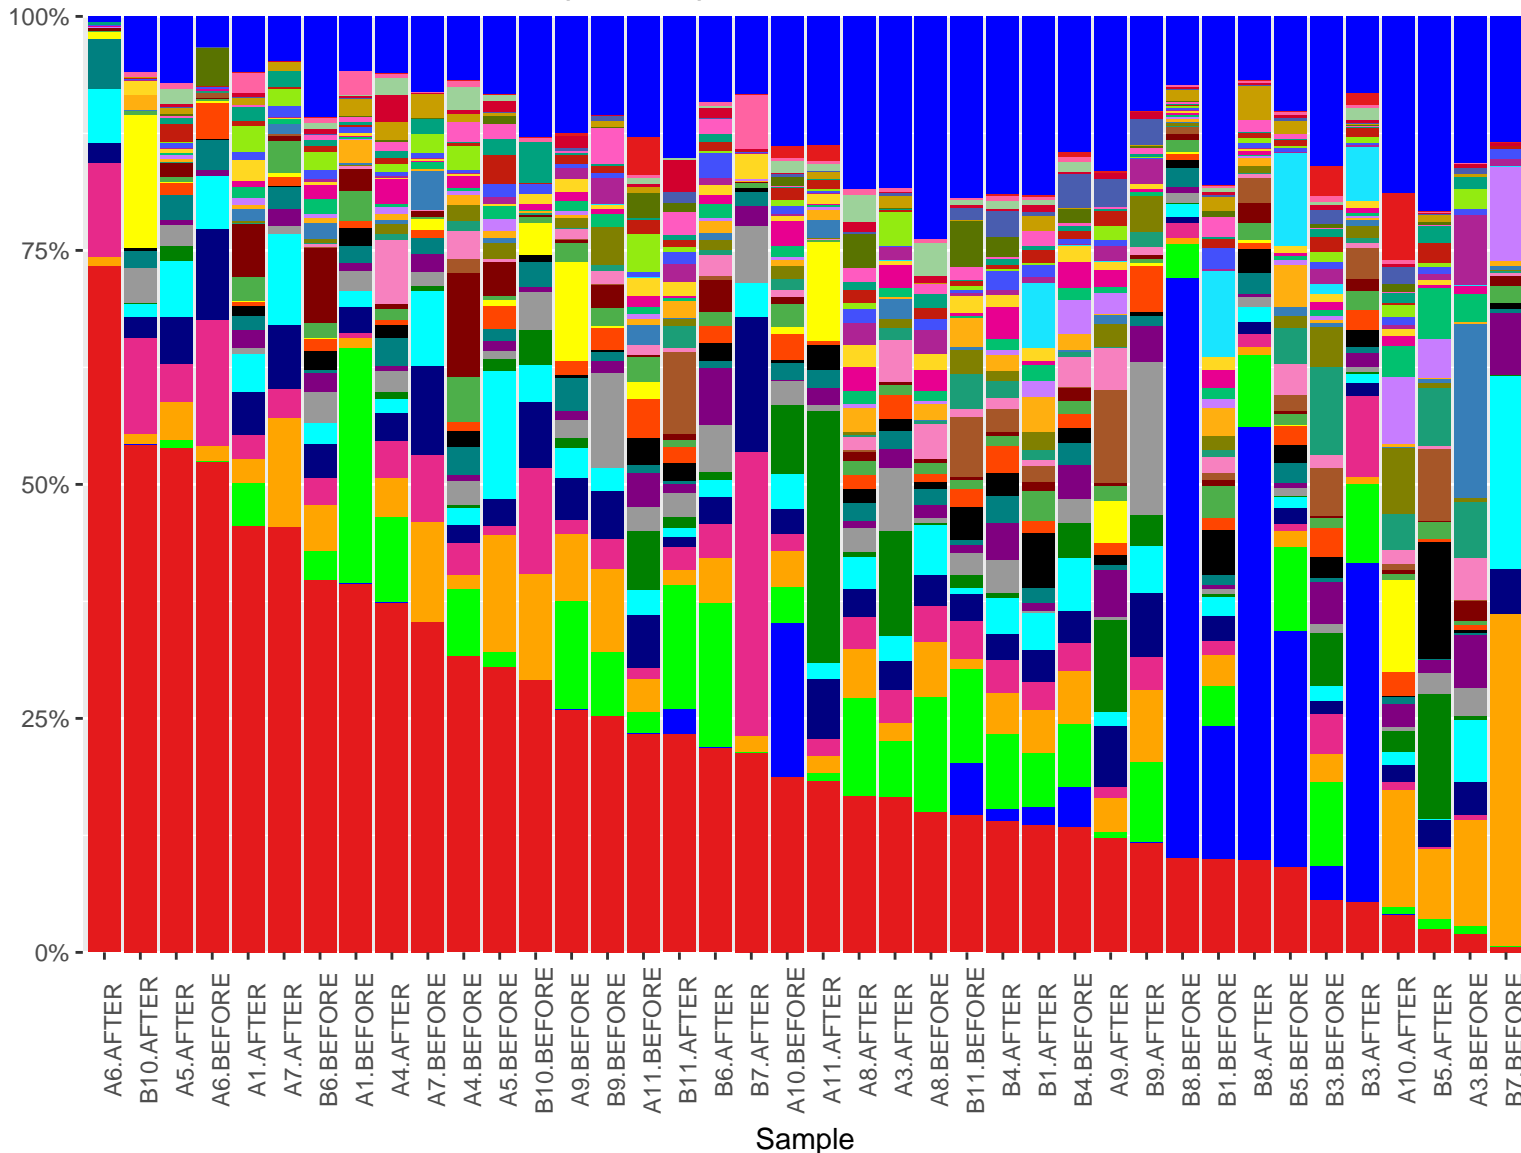

Genus

- other
- Streptococcus
- Odoribacter
- Sutterella
- Fusicatenibacter
- RuminococcaceaeUCG-005
- Dialister
- Ruminiclostridium6
- Lachnospira
- Anaerostipes
- Dorea
- Ruminococcus2
- LachnospiraceaeUCG-008
- [Ruminococcus]gavreuiiigroup
- Prevotella2
- unculturedbacterium
- LachnospiraceaeNC2004group
- [Eubacterium]halliigroup
- Collinsella
- LachnospiraceaeNK4A136group
- Bifidobacterium
- RuminococcaceaeUCG-002
- ChristensenellaceaeR-7group
- Ruminococcus1
- RuminococcaceaeUCG-014
- Pseudobutyrvibrio
- Roseburia
- Escherichia-Shigella
- [Eubacterium]coprostanoligenesgroup
- Subdoligranulum
- LachnospiraceaeUCG-004
- Ruminiclostridium5
- Alistipes
- Akkermansia
- Lachnoclostridium
- uncultured
- Parabacteroides
- Blautia
- Faecalibacterium
- Prevotella9
- Bacteroides
