# Supplementary material for: Effects of Synbiotic Supplement on Human Gut Microbiota, Body Composition and Weight Loss in Obesity
Source: MDPI journal article supplement (doi:10.3390/nu12010222), 2020-01-15

Read counts per sample at each processing stage

ReadsPerSample

600,000

400,000

200,000

0

B11.AFTER A7.AFTER A3.BEFORE B9.AFTER B9.BEFORE A11.AFTER A5.AFTER B9.BEFORE A10.AFTER B10.BEFORE B3.AFTER B7.BEFORE B3.BEFORE A11.BEFORE B10.AFTER B1.AFTER A5.BEFORE A4.BEFORE B11.BEFORE A9.AFTER A7.BEFORE B8.AFTER A8.AFTER A6.AFTER B5.BEFORE A10.BEFORE B8.BEFORE A8.BEFORE B7.AFTER A1.AFTER A6.BEFORE B6.BEFORE B4.BEFORE B4.AFTER B1.BEFORE A3.AFTER B6.AFTER A1.BEFORE A4.AFTER B5.AFTER B3.BEFORE

Sample

Read Count

 a\_Raw  b\_Filtered  c\_Classified

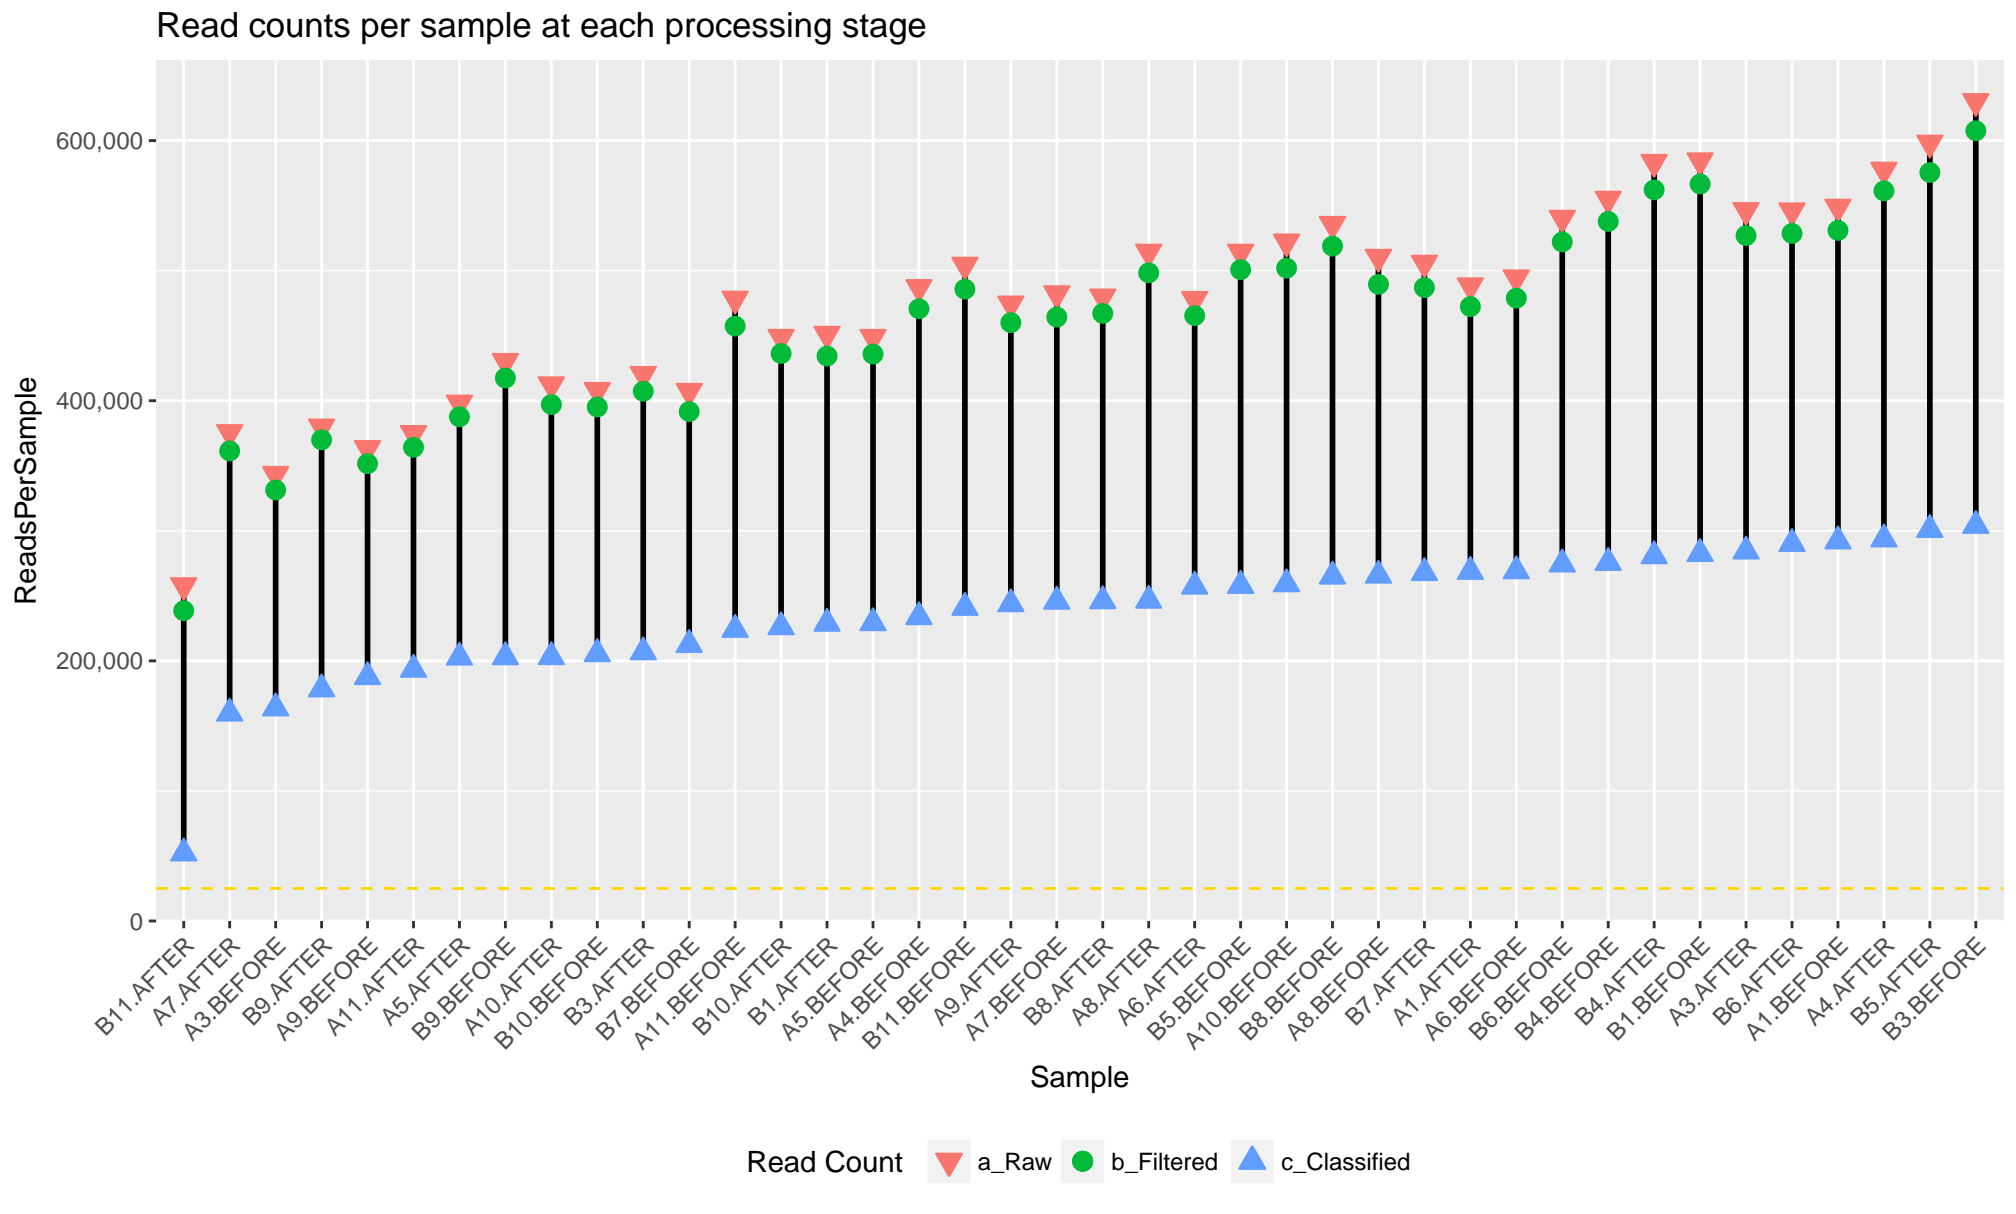

Supplement: s1 [file s1]
