# Supplementary figures and images for: Effects of Synbiotic Supplement on Human Gut Microbiota, Body Composition and Weight Loss in Obesity
Source: MDPI journal article supplement (doi:10.3390/nu12010222), 2020-01-15

# Relative Abundance of Species per Sample

RelativeAbundance

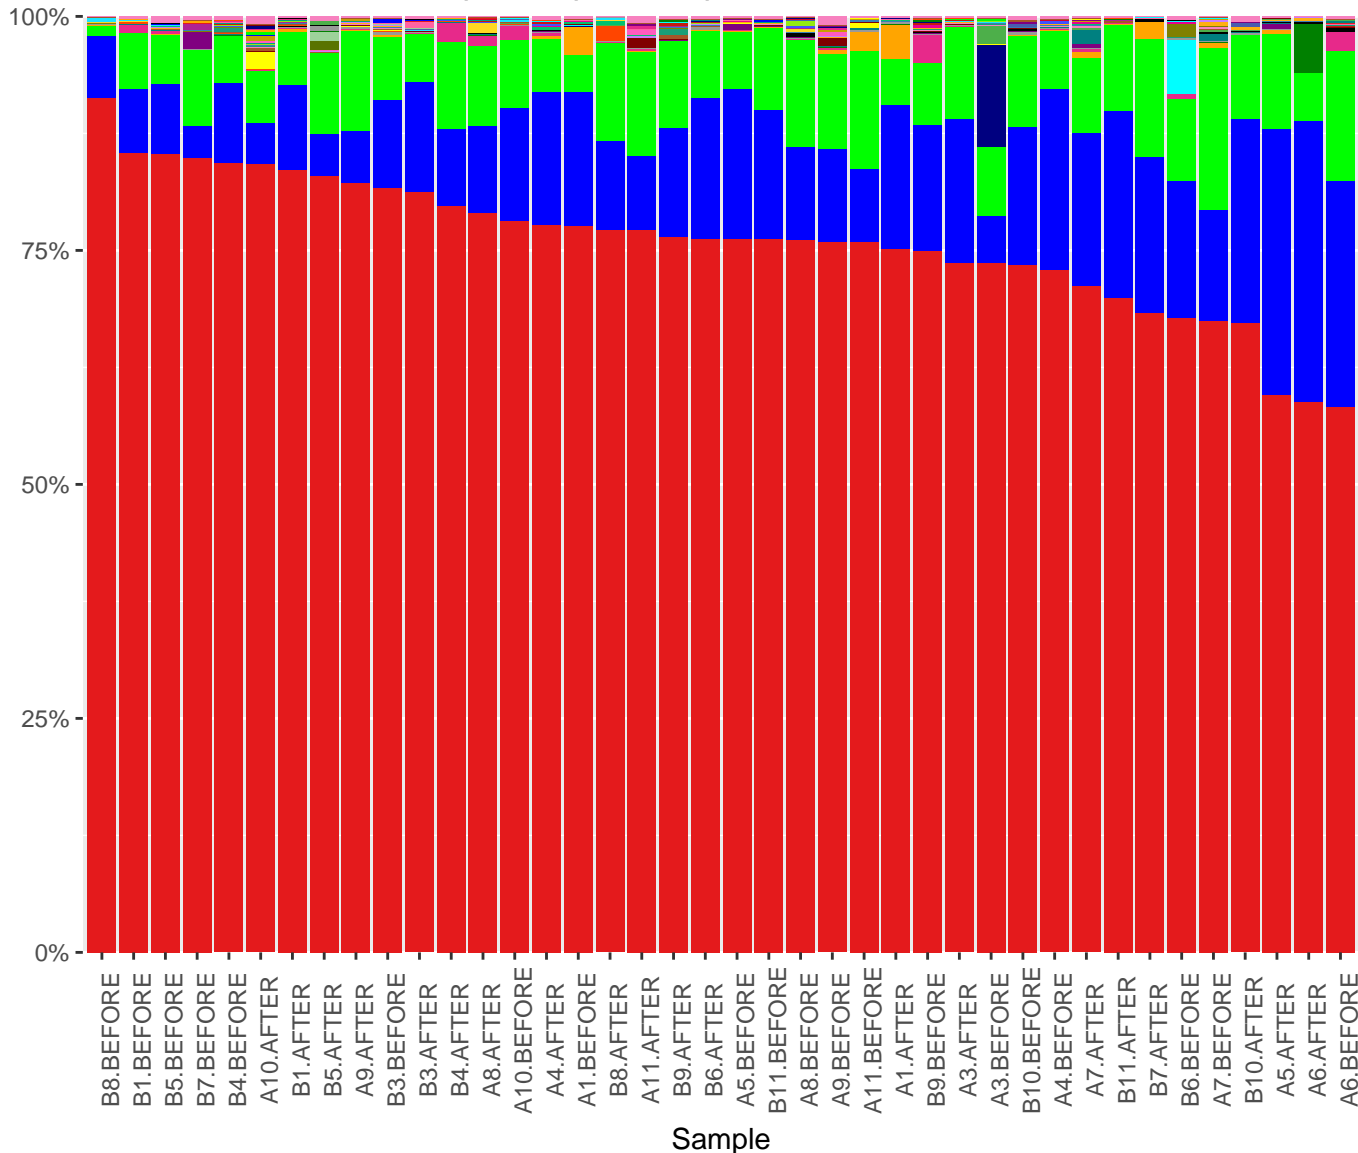

Sample

Supplement: s1 [file s1]

# Mean Relative Abundance of Species per Group

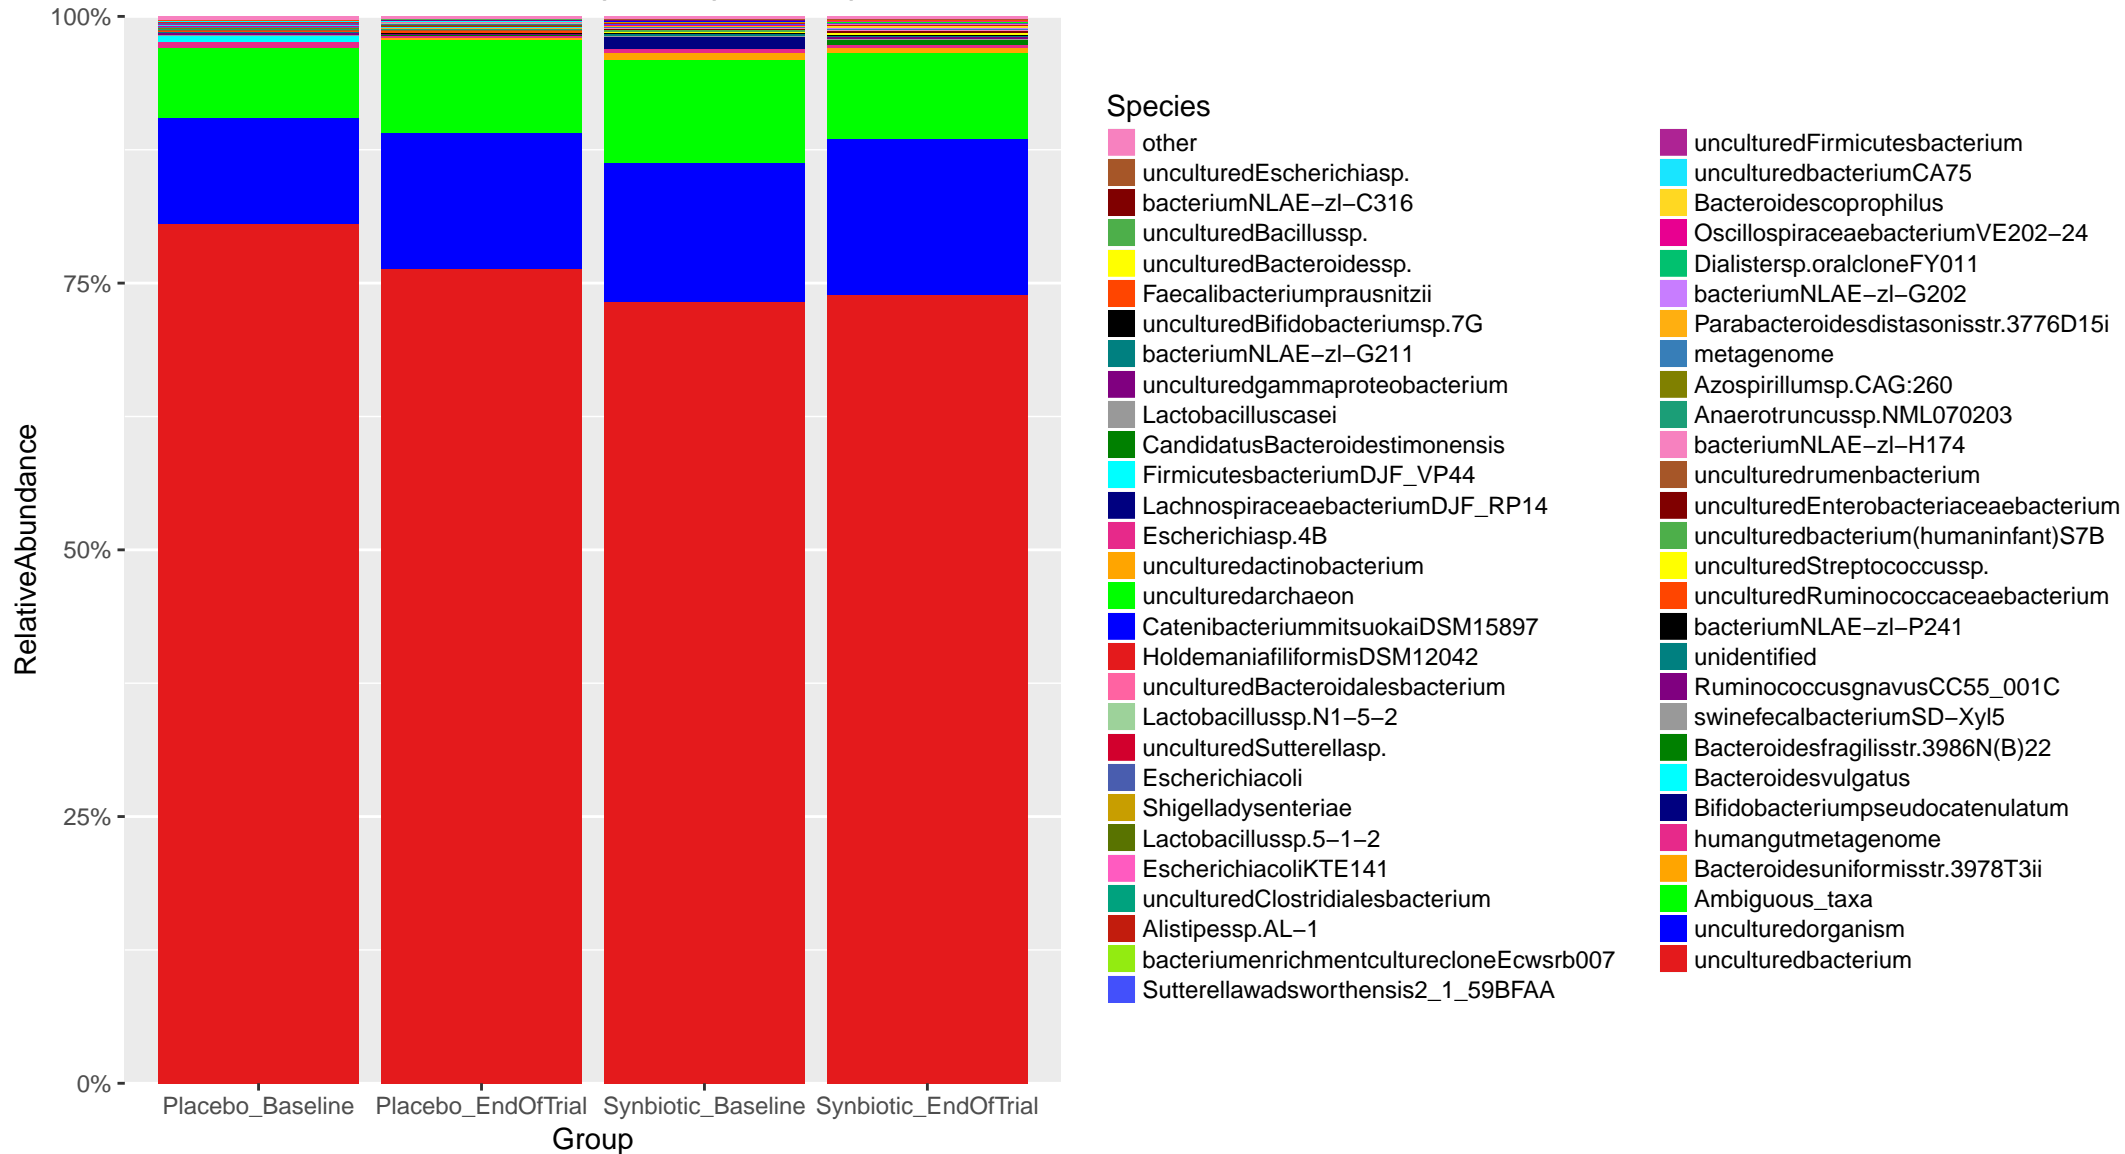

Supplement: s1 [file s1]

## Relative Abundance of Phyla per Sample

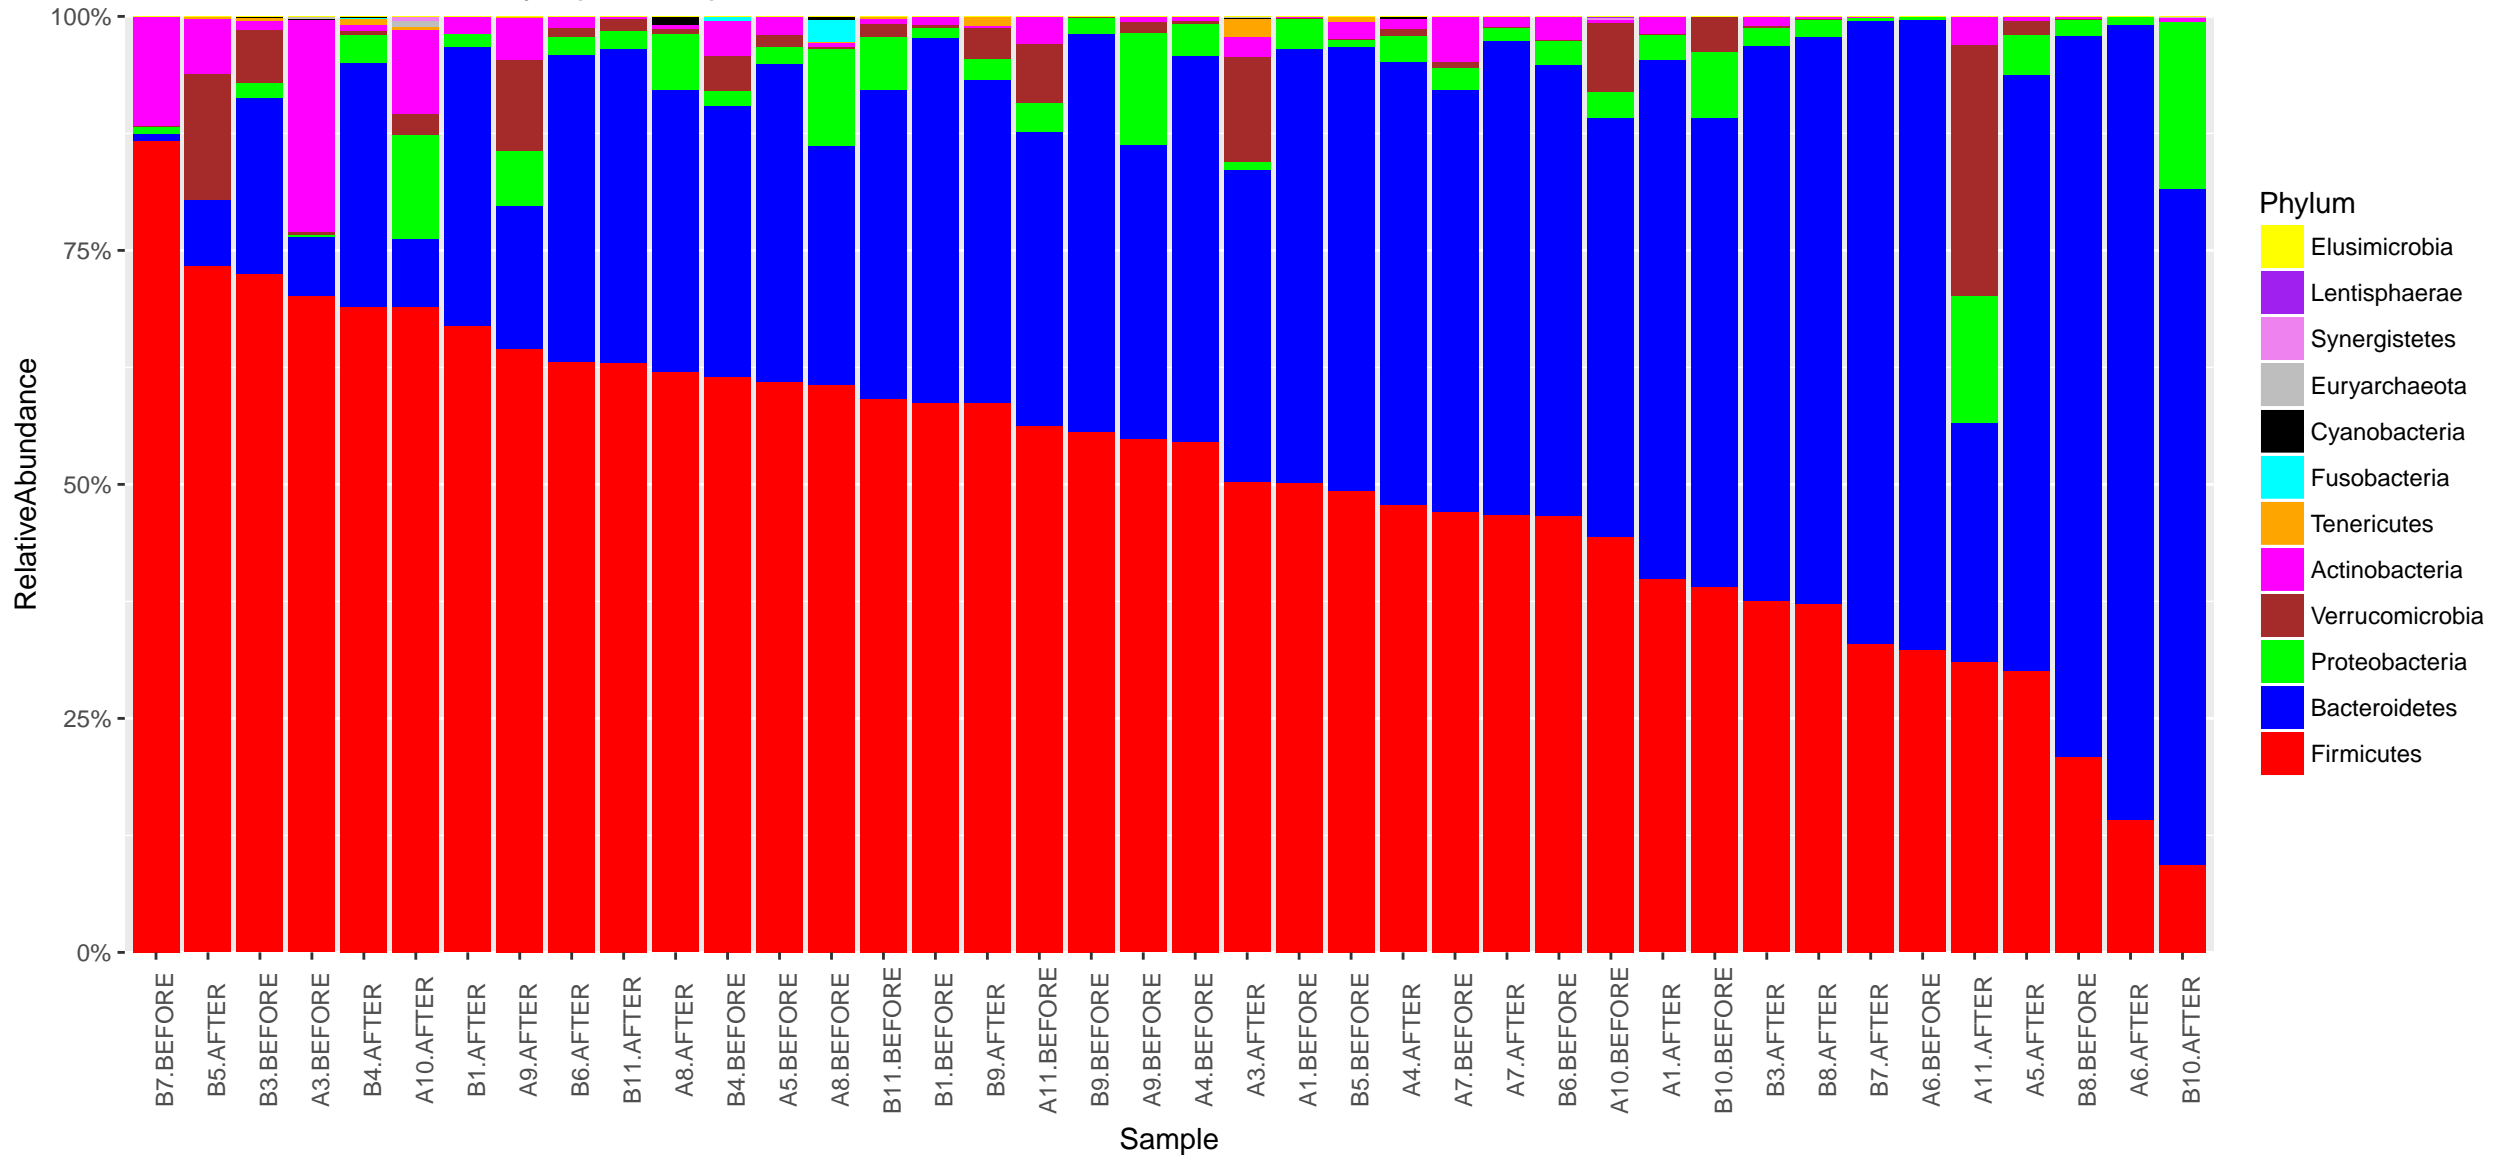

Supplement: s1 [file s1]
